# Supplementary material for: Preparation of an rGO and iron oxide nanoparticle-incorporated polyvinyl acetate based membrane for the removal of Pb2+ from anticorrosive paint industrial wastewater
Source: Royal Society of Chemistry journal article supplement (doi:10.1039/d2ew00172a), 2022-01-01
Supplement: d2ew00172a1.pdf [file d2ew00172a1.pdf]

## **Supporting information**

### **Preparation of rGO and Iron Oxide Nanoparticles Incorporated Polyvinyl Acetate based Membrane for the removal of Pb<sup>2+</sup> from Anti-corrosive paint Industrial wastewater**

Muhammad Yaseen<sup>1\*</sup>, Waqas Ahmad<sup>1</sup>, Maria<sup>1</sup>, Muhammad Usman Farooq<sup>2</sup>, Muhammad Shakir<sup>3</sup>, Abdul Naeem<sup>4</sup>

<sup>1</sup>*Institute of Chemical Sciences, University of Peshawar, 25120, KP, Pakistan.*

<sup>2</sup>*Department of Chemical Engineering, Ghulam Ishaq Khan Institute of Engineering Sciences & Technology, Topi, Swabi, KP,  
Pakistan.*

<sup>3</sup>*Institute of Space Technology, Islamabad, 44000, Pakistan*

<sup>4</sup>*National Center of Excellence in Physical Chemistry, University of Peshawar, KP, Pakistan.*

Corresponding author: **Muhammad Yaseen**

Email: [myyousafzai@gmail.com](mailto:myyousafzai@gmail.com), [myyousafzai@uop.edu.pk](mailto:myyousafzai@uop.edu.pk)

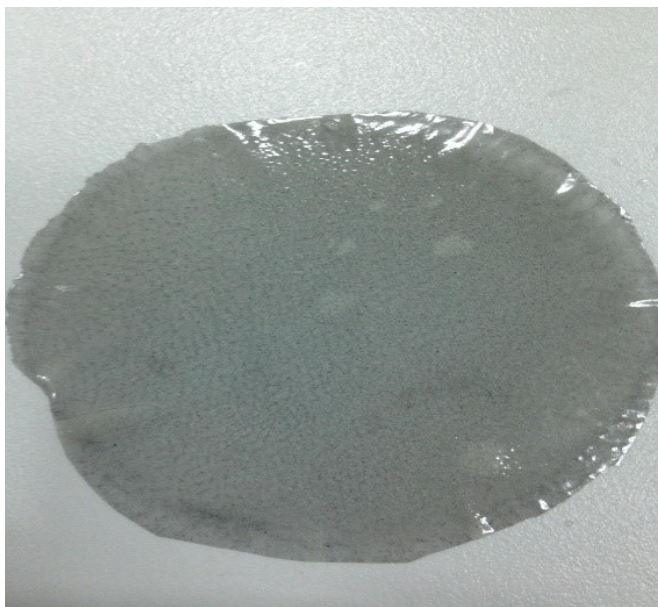

**Figure S1:** Image of the synthesized hybrid membrane

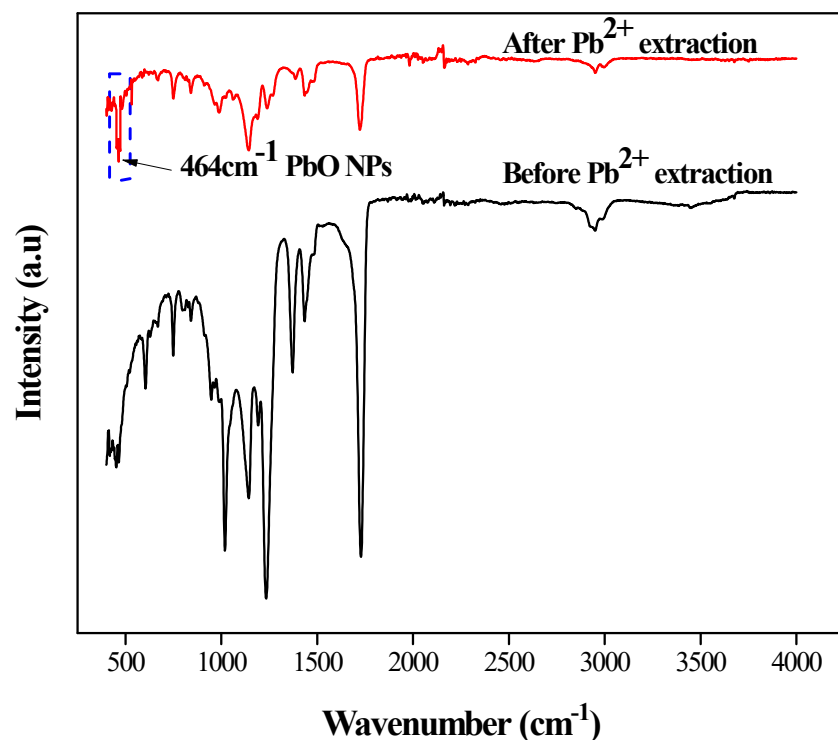

**Figure S2:** FTIR analysis of PVAc/rGO/ $\text{Fe}_2\text{O}_3$  membrane before and after extraction of  $\text{Pb}^{2+}$  from anticorrosive paint wastewater.

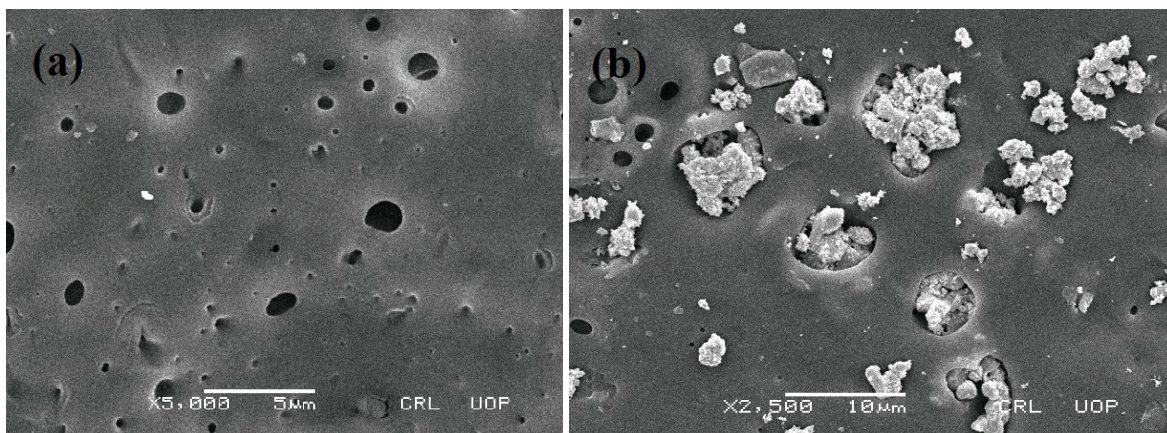

**Figure S3:** SEM image of PVAc/rGO/Fe<sub>2</sub>O<sub>3</sub> membrane **(a)** fresh and **(b)** spent.

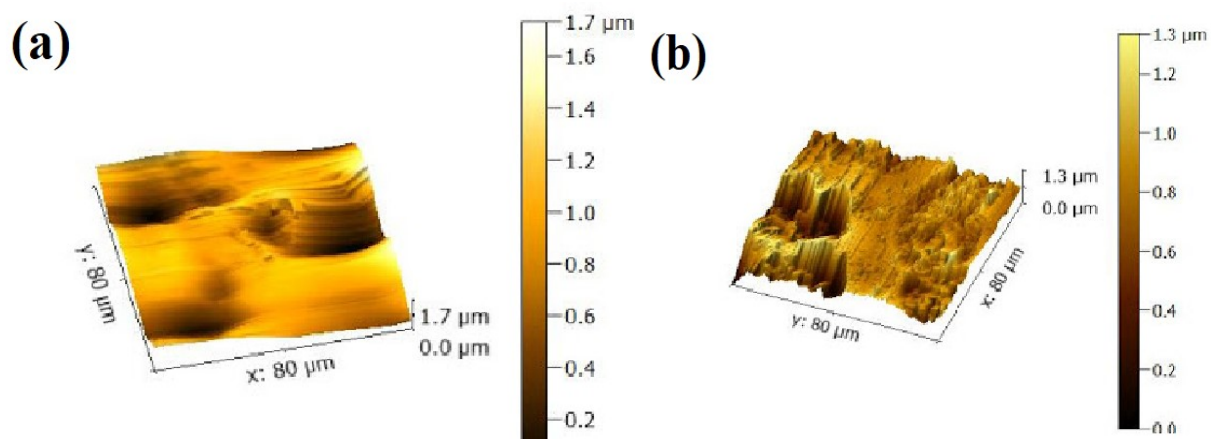

**Figure S4:** AFM 3D image of the PVAc/rGO/Fe<sub>2</sub>O<sub>3</sub> membrane **(a)** fresh and **(b)** spent.

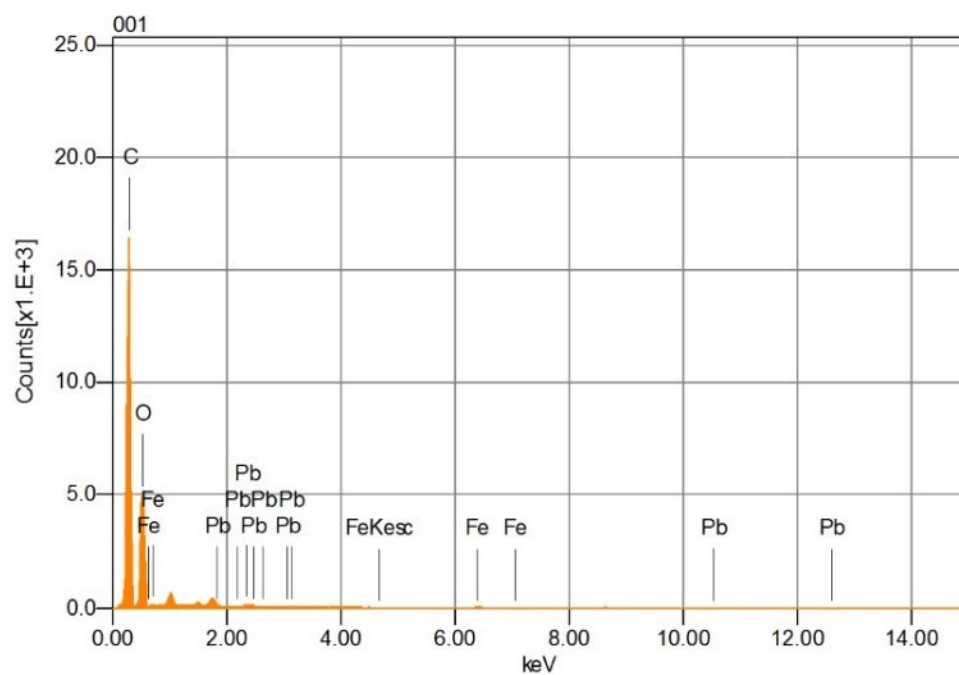

**Figure S5:** EDX analysis of spent PVAc/rGO/Fe<sub>2</sub>O<sub>3</sub> membrane.

**Table S1.** EDX analysis of the post-Pb<sup>2+</sup> removal PVAc/rGO/Fe<sub>2</sub>O<sub>3</sub> membrane from anti-corrosive paint industrial wastewater.

| Membrane                                    | Element | Mass (%) | Atom (%) | Total |
|---------------------------------------------|---------|----------|----------|-------|
| <b>PVAc/rGO/Fe<sub>2</sub>O<sub>3</sub></b> | C       | 52.00    | 55.60    | 100   |
|                                             | O       | 47.25    | 44.24    |       |
|                                             | Fe      | 0.14     | 0.04     |       |
|                                             | Pb      | 0.61     | 0.12     |       |
